# Supplementary material
Source: publisher figshare collection journal article supplement (https://gsajournals.figshare.com/ndownloader/files/17818385)
Supplement: Supplementary file 1 [file 17818385]

## Sheet: FPR3 interactors (456)
List of the 456 genetic interactors specific to the FPR3 screen
ORF	Gene
YAL010C	MDM10
YAL012W	CYS3
YAL024C	LTE1
YAL044C	GCV3
YAL067W-A	YAL067W-A
YBL022C	PIM1
YBL027W	RPL19B
YBL038W	MRPL16
YBL054W	TOD6
YBL058W	SHP1
YBL072C	RPS8A
YBL090W	MRP21
YBL091C-A	SCS22
YBR026C	ETR1
YBR058C	UBP14
YBR104W	YMC2
YBR128C	ATG14
YBR173C	UMP1
YBR179C	FZO1
YBR221C	PDB1
YBR231C	SWC5
YCL008C	STP22
YCL016C	DCC1
YCL032W	STE50
YCL060C*	MRC1
YCL061C	MRC1
YCR020W-B	HTL1
YCR028C-A	RIM1
YCR045C	RRT12
YCR047C	BUD23
YCR063W	BUD31
YDL044C	MTF2
YDL088C	ASM4
YDL100C	GET3
YDL107W	MSS2
YDL115C	IWR1
YDL123W	SNA4
YDL167C	NRP1
YDL202W	MRPL11
YDR017C	KCS1
YDR024W	FYV1
YDR074W	TPS2
YDR083W	RRP8
YDR102C	YDR102C
YDR108W	TRS85
YDR130C	FIN1
YDR136C	VPS61
YDR149C	YDR149C
YDR150W	NUM1
YDR159W	SAC3
YDR165W	TRM82
YDR173C	ARG82
YDR174W	HMO1
YDR175C	RSM24
YDR194C	MSS116
YDR194W-A	YDR194W-A
YDR197W	CBS2
YDR204W	COQ4
YDR237W	MRPL7
YDR245W	MNN10
YDR247W	VHS1
YDR254W	CHL4
YDR268W	MSW1
YDR276C	PMP3
YDR285W	ZIP1
YDR318W	MCM21
YDR322W	MRPL35
YDR323C	PEP7
YDR329C	PEX3
YDR337W	MRPS28
YDR347W	MRP1
YDR378C	LSM6
YDR392W	SPT3
YDR418W	RPL12B
YDR459C	PFA5
YDR479C	PEX29
YDR485C	VPS72
YDR532C	KRE28
YEL024W	RIP1
YEL038W	UTR4
YEL043W	YEL043W
YEL054C	RPL12A
YEL061C	CIN8
YEL064C	AVT2
YER016W	BIM1
YER026C	CHO1
YER041W	YEN1
YER056C-A	RPL34A
YER061C	CEM1
YER080W	AIM9
YER084W	YER084W
YER087W	AIM10
YER115C	SPR6
YER119C-A	YER119C-A
YER120W	SCS2
YER128W	VFA1
YER137C	YER137C
YER153C	PET122
YER154W	OXA1
YER155C	BEM2
YER156C	YER156C
YFL016C	MDJ1
YFL027C	GYP8
YFL036W	RPO41
YFR020W	YFR020W
YFR021W	ATG18
YFR036W	CDC26
YGL063W	PUS2
YGL064C	MRH4
YGL071W	AFT1
YGL072C	YGL072C
YGL088W	YGL088W
YGL105W	ARC1
YGL107C	RMD9
YGL147C	RPL9A
YGL148W	ARO2
YGL162W	SUT1
YGL164C	YRB30
YGL173C	XRN1
YGL177W	YGL177W
YGL191W	COX13
YGL214W	YGL214W
YGL218W	YGL218W
YGL240W	DOC1
YGL246C	RAI1
YGL255W	ZRT1
YGR020C	VMA7
YGR063C	SPT4
YGR076C	MRPL25
YGR092W	DBF2
YGR101W	PCP1
YGR102C	GTF1
YGR155W	CYS4
YGR160W	YGR160W
YGR167W	CLC1
YGR180C	RNR4
YGR188C	BUB1
YGR193C	PDX1
YGR215W	RSM27
YGR219W	YGR219W
YGR220C	MRPL9
YGR225W	AMA1
YGR257C	MTM1
YGR271C-A	EFG1
YGR272C*	EFG1
YHL043W	ECM34
YHL044W	YHL044W
YHR001W-A	QCR10
YHR010W	RPL27A
YHR011W	DIA4
YHR021C	RPS27B
YHR039C-B*	VMA10
YHR100C	GEP4
YHR147C	MRPL6
YHR191C	CTF8
YHR200W	RPN10
YIL007C	NAS2
YIL040W	APQ12
YIL093C	RSM25
YIL128W	MET18
YIR037W	HYR1
YIR038C	GTT1
YJL006C	CTK2
YJL023C	PET130
YJL028W	YJL028W
YJL029C	VPS53
YJL055W	YJL055W
YJL059W	YHC3
YJL082W	IML2
YJL101C	GSH1
YJL130C	URA2
YJL144W	YJL144W
YJL153C	INO1
YJL166W	QCR8
YJL168C	SET2
YJR026W	undefined
YJR032W	CPR7
YJR037W	YJR037W
YJR043C	POL32
YJR060W	CBF1
YJR070C	LIA1
YJR074W	MOG1
YJR100C	AIM25
YJR101W	RSM26
YJR102C	VPS25
YJR114W	YJR114W
YJR118C	ILM1
YKL007W	CAP1
YKL040C	NFU1
YKL057C	NUP120
YKL139W	CTK1
YKL155C	RSM22
YKL160W	ELF1
YKL171W	NNK1
YKL176C	LST4
YKL211C	TRP3
YKL213C	DOA1
YKL216W	URA1
YKL220C	FRE2
YKR006C	MRPL13
YKR035W-A	DID2
YKR054C	DYN1
YKR074W	AIM29
YKR082W	NUP133
YKR085C	MRPL20
YLL038C	ENT4
YLL049W	LDB18
YLR039C	RIC1
YLR055C	SPT8
YLR065C	ENV10
YLR068W	FYV7
YLR069C	MEF1
YLR089C	ALT1
YLR091W	GEP5
YLR130C	ZRT2
YLR194C	YLR194C
YLR204W	QRI5
YLR225C	YLR225C
YLR253W	YLR253W
YLR261C	VPS63
YLR268W	SEC22
YLR312W-A	MRPL15
YLR315W	NKP2
YLR353W	BUD8
YLR357W	RSC2
YLR381W	CTF3
YLR382C	NAM2
YLR390W	ECM19
YLR396C	VPS33
YLR410W	VIP1
YLR420W	URA4
YLR435W	TSR2
YLR436C	ECM30
YLR437C	DIF1
YLR439W	MRPL4
YLR441C	RPS1A
YLR443W	ECM7
YLR445W	GMC2
YLR447C	VMA6
YLR448W	RPL6B
YLR449W	FPR4
YLR450W	HMG2
YLR451W	LEU3
YLR452C	SST2
YLR453C	RIF2
YLR454W	FMP27
YLR455W	YLR455W
YLR456W	YLR456W
YLR461W	PAU4
YML013W	UBX2
YML041C	VPS71
YML052W	SUR7
YML055W	SPC2
YML056C	IMD4
YML058C-A*	YML057C-A
YML058W-A	HUG1
YML083C	YML083C
YML084W	YML084W
YML086C	ALO1
YML095C-A*	YML094C-A
YML102C-A*	YML101C-A
YML103C	NUP188
YML107C	PML39
YML109W	ZDS2
YML112W	CTK3
YML117W-A*	YML116W-A
YML119W	YML119W
YMR022W	UBC7
YMR035W	IMP2
YMR048W	CSM3
YMR063W	RIM9
YMR066W	SOV1
YMR072W	ABF2
YMR077C	VPS20
YMR081C	ISF1
YMR084W	YMR084W
YMR089C	YTA12
YMR142C	RPL13B
YMR143W	RPS16A
YMR150C	IMP1
YMR151W	YIM2
YMR228W	MTF1
YMR272C	SCS7
YMR286W	MRPL33
YMR294W	JNM1
YMR316C-A	YMR316C-A
YNL005C	MRP7
YNL011C	YNL011C
YNL041C	COG6
YNL055C	POR1
YNL064C	YDJ1
YNL069C	RPL16B
YNL071W	LAT1
YNL107W	YAF9
YNL147W	LSM7
YNL148C	ALF1
YNL162W	RPL42A
YNL169C	PSD1
YNL170W	YNL170W
YNL177C	MRPL22
YNL215W	IES2
YNL218W	MGS1
YNL223W	ATG4
YNL225C	CNM67
YNL246W	VPS75
YNL250W	RAD50
YNL252C	MRPL17
YNL266W	YNL266W
YNL271C	BNI1
YNL273W	TOF1
YNL277W-A	YNL277W-A
YNL284C	MRPL10
YNL285W	YNL285W
YNL295W	YNL295W
YNL302C	RPS19B
YNL319W	YNL319W
YNL323W	LEM3
YNR015W	SMM1
YNR036C	MRPS12
YOL008W	COQ10
YOL016C	CMK2
YOL019W	YOL019W
YOL033W	MSE1
YOL049W	GSH2
YOL132W	GAS4
YOR026W	BUB3
YOR125C	CAT5
YOR144C	ELG1
YOR158W	PET123
YOR164C	GET4
YOR178C	GAC1
YOR187W	TUF1
YOR192C	THI72
YOR196C	LIP5
YOR200W	YOR200W
YOR205C	GEP3
YOR211C	MGM1
YOR215C	AIM41
YOR269W	PAC1
YOR309C	YOR309C
YOR330C	MIP1
YOR349W	CIN1
YOR354C	MSC6
YOR357C	SNX3
YPL002C	SNF8
YPL003W	ULA1
YPL017C	IRC15
YPL018W	CTF19
YPL030W	TRM44
YPL065W	VPS28
YPL068C	YPL068C
YPL075W	GCR1
YPL090C	RPS6A
YPL097W	MSY1
YPL102C	YPL102C
YPL106C	SSE1
YPL115C	BEM3
YPL118W	MRP51
YPL148C	PPT2
YPL173W	MRPL40
YPL174C	NIP100
YPL178W	CBC2
YPL206C	PGC1
YPL224C	MMT2
YPL226W	NEW1
YPL264C	YPL264C
YPL265W	DIP5
YPR032W	SRO7
YPR043W	RPL43A
YPR090W*	YPR089W
YPR116W	RRG8
YPR119W	CLB2
YPR135W	CTF4
YPR141C	KAR3
YPR191W	QCR2
undefined	undefined
YBR082C	UBC4
YBR122C	MRPL36
YBR163W	EXO5
YBR268W	MRPL37
YDR008C	YDR008C
YDR079C-A	TFB5
YDR079W	PET100
YDR207C	UME6
YDR300C	PRO1
YDR500C	RPL37B
YER017C	AFG3
YER045C	ACA1
YER110C	KAP123
YGL080W	FMP37
YGL180W	ATG1
YGR111W	YGR111W
YGR157W	CHO2
YGR165W	MRPS35
YGR276C	RNH70
YHL011C	PRS3
YHR013C	ARD1
YHR018C	ARG4
YHR067W	HTD2
YHR162W	MPC2
YHR178W	STB5
YHR198C	AIM18
YIR009W	MSL1
YJL046W	AIM22
YJL088W	ARG3
YJL096W	MRPL49
YJL127C	SPT10
YJL188C	BUD19
YJR018W	YJR018W
YKL120W	OAC1
YKL170W	MRPL38
YKL194C	MST1
YKR039W	GAP1
YKR065C	PAM17
YLL033W	IRC19
YLL039C	UBI4
YLR104W	LCL2
YLR182W	SWI6
YLR211C	YLR211C
YLR239C	LIP2
YLR267W	BOP2
YLR322W	VPS65
YLR369W	SSQ1
YLR395C	COX8
YLR403W	SFP1
YLR417W	VPS36
YML054C-A	YML054C-A
YML081C-A	ATP18
YML090W	YML090W
YML101C	CUE4
YML106W	URA5
YMR097C	MTG1
YMR198W	CIK1
YMR207C	HFA1
YMR315W	YMR315W
YNL073W	MSK1
YNL104C	LEU4
YNL129W	NRK1
YNL138W	SRV2
YNL171C	YNL171C
YNL264C	PDR17
YNL265C	IST1
YNL269W	BSC4
YNL315C	ATP11
YOR150W	MRPL23
YOR201C	MRM1
YOR221C	MCT1
YOR271C	FSF1
YOR305W	RRG7
YOR382W	FIT2
YPL114W	YPL114W
YPL177C	CUP9
YPL249C-A	RPL36B
YPR028W	YOP1
YPR067W	ISA2
YPR173C	VPS4

## Sheet: FPR4 interactors (138)
List of the 138 genetic interactors specific to the FPR4 screen
ORF	Gene
YBL080C	PET112
YBR020W	GAL1
YBR028C	YPK3
YBR031W	RPL4A
YBR185C	MBA1
YBR196C-A	YBR196C-A
YBR271W	EFM2
YBR289W	SNF5
YCR004C	YCP4
YCR016W	YCR016W
YCR069W	CPR4
YCR083W	TRX3
YDR011W	SNQ2
YDR028C	REG1
YDR110W	FOB1
YDR128W	MTC5
YDR221W	GTB1
YDR290W	YDR290W
YDR316W	OMS1
YDR348C	PAL1
YDR350C	ATP22
YDR405W	MRP20
YDR421W	ARO80
YDR529C	QCR7
YDR535C	YDR535C
YER014C-A	BUD25
YER049W	TPA1
YFR013W	IOC3
YGL007C-A	YGL007C-A
YGL013C	PDR1
YGL087C	MMS2
YGL170C	SPO74
YGL186C	TPN1
YGL202W	ARO8
YGL219C	MDM34
YGL237C	HAP2
YGR043C	NQM1
YGR057C	LST7
YHL003C	LAG1
YHL006C	SHU1
YHR079C	IRE1
YHR103W	SBE22
YHR111W	UBA4
YHR117W	TOM71
YHR140W	YHR140W
YIL038C	NOT3
YIL041W	GVP36
YIL052C	RPL34B
YIL077C	YIL077C
YIL092W	YIL092W
YIL122W	POG1
YIL137C	TMA108
YIL155C	GUT2
YJL016W	YJL016W
YJL020C	BBC1
YJL030W	MAD2
YJL036W	SNX4
YJL127C-B	YJL127C-B
YJL137C	GLG2
YJL163C	YJL163C
YJL172W	CPS1
YJL191W	RPS14B
YJL193W	YJL193W
YJR010W	MET3
YJR054W	YJR054W
YJR058C	APS2
YJR080C	AIM24
YJR125C	ENT3
YKL044W	YKL044W
YKL198C	PTK1
YKL207W	EMC3
YKR078W	YKR078W
YKR093W	PTR2
YLR124W	YLR124W
YLR278C	YLR278C
YLR294C	YLR294C
YLR419W	YLR419W
YLR423C	ATG17
YMR010W	YMR010W
YMR071C	TVP18
YMR178W	YMR178W
YNL020C	ARK1
YNL022C	YNL022C
YNL023C	FAP1
YNL058C	YNL058C
YNL091W	NST1
YNL154C	YCK2
YNL159C	ASI2
YNL213C	RRG9
YNL239W	LAP3
YNL253W	TEX1
YNL275W	BOR1
YNR007C	ATG3
YNR013C	PHO91
YOL075C	YOL075C
YOL080C	REX4
YOL097W-A	YOL097W-A
YOL110W	SHR5
YOL152W	FRE7
YOR005C	DNL4
YOR065W	CYT1
YOR083W	WHI5
YOR175C	ALE1
YOR298C-A	MBF1
YOR342C	YOR342C
YPL024W	RMI1
YPL137C	GIP3
YPL166W	ATG29
YPL189C-A	COA2
YPR075C	OPY2
YPR192W	AQY1
YAL026C	DRS2
YBR021W	FUR4
YDR345C	HXT3
YDR477W	SNF1
YEL041W	YEF1
YER058W	PET117
YER096W	SHC1
YFL031W	HAC1
YFL032W	YFL032W
YHR048W	YHK8
YHR209W	CRG1
YIR023W	DAL81
YJL073W	JEM1
YJL077W-B	YJL077W-B
YJL129C	TRK1
YKL011C	CCE1
YLR242C	ARV1
YLR337C	VRP1
YLR338W	OPI9
YML047C	PRM6
YNL090W	RHO2
YNL278W	CAF120
YOL044W	PEX15
YOR036W	PEP12
YOR290C	SNF2
YPL031C	PHO85
YPR072W	NOT5

## Sheet: FPR3 and FPR4 shared (78)
List of the 78 genetic interactors present in both FPR3 and FPR4 screens
ORF	Gene
YCR028C	FEN2
YDR200C	VPS64
YDR298C	ATP5
YDR417C	YDR417C
YEL059C-A	SOM1
YFR047C	BNA6
YHL038C	CBP2
YHR041C	SRB2
YHR142W	CHS7
YHR195W	NVJ1
YIL006W	YIA6
YJL183W	MNN11
YJR075W	HOC1
YKL048C	ELM1
YKL101W	HSL1
YKR035C	OPI8
YKR094C	RPL40B
YLR120C	YPS1
YLR193C	UPS1
YML060W	OGG1
YMR036C	MIH1
YNL255C	GIS2
YOL003C	PFA4
YOR008C-A	YOR008C-A
YOR062C	YOR062C
YOR199W	YOR199W
YPL005W	AEP3
YPL029W	SUV3
YPR054W	SMK1
YAL035W	FUN12
YBL006C	LDB7
YBR101C	FES1
YCL005W	LDB16
YCR002C	CDC10
YDL072C	YET3
YDL073W	YDL073W
YDL075W	RPL31A
YDR027C	VPS54
YDR069C	DOA4
YDR176W	NGG1
YDR179C	CSN9
YDR448W	ADA2
YDR495C	VPS3
YEL063C	CAN1
YFL018C	LPD1
YGL033W	HOP2
YGL127C	SOH1
YGL136C	MRM2
YGL188C-A	YGL188C-A
YGR014W	MSB2
YGR062C	COX18
YGR064W	YGR064W
YGR252W	GCN5
YHL004W	MRP4
YHR141C	RPL42B
YIL098C	FMC1
YIR034C	LYS1
YJR055W	HIT1
YJR104C	SOD1
YJR109C	CPA2
YKL002W	DID4
YKL041W	VPS24
YKL204W	EAP1
YLR025W	SNF7
YML010W-A*	YML009W-B
YMR098C	ATP25
YNL095C	YNL095C
YNL197C	WHI3
YNL224C	SQS1
YNL242W	ATG2
YNL270C	ALP1
YNL280C	ERG24
YNR010W	CSE2
YOR147W	MDM32
YOR251C	TUM1
YOR369C	RPS12
YPL084W	BRO1
YPR159W	KRE6

## Sheet: FPR3FPR4 masked (75)
List of the 75 masked genetic interactors present only in the FPR3FPR4 screens
ORF	Gene
YAR018C	KIN3
YBL046W	PSY4
YBL075C	SSA3
YBL100C	YBL100C
YBL104C	SEA4
YBR036C	CSG2
YBR041W	FAT1
YCL038C	ATG22
YDL142C	CRD1
YDL170W	UGA3
YDL180W	YDL180W
YDL232W	OST4
YDR193W	YDR193W
YDR319C	YFT2
YDR457W	TOM1
YDR501W	PLM2
YDR515W	SLF1
YEL028W	YEL028W
YER015W	FAA2
YER091C-A	YER091C-A
YER121W	YER121W
YER140W	YER140W
YFR012W	DCV1
YFR045W	YFR045W
YFR048W	RMD8
YGL020C	GET1
YGL023C	PIB2
YGL086W	MAD1
YGL211W	NCS6
YGL253W	HXK2
YGR003W	CUL3
YGR213C	RTA1
YHR071W	PCL5
YHR183W	GND1
YIL079C	AIR1
YIR039C	YPS6
YJL024C	APS3
YJL116C	NCA3
YJL175W	YJL175W
YJL180C	ATP12
YJR005W	APL1
YKL117W	SBA1
YKL150W	MCR1
YKL205W	LOS1
YKR012C	YKR012C
YKR084C	HBS1
YKR090W	PXL1
YLL017W	YLL017W
YLR073C	RFU1
YLR081W	GAL2
YLR393W	ATP10
YML097C	VPS9
YML118W	NGL3
YMR083W	ADH3
YMR111C	YMR111C
YMR119W	ASI1
YMR132C	JLP2
YMR179W	SPT21
YMR234W	RNH1
YMR278W	PGM3
YNL080C	EOS1
YNL123W	NMA111
YNL299W	TRF5
YOL019W-A	YOL019W-A
YOL136C	PFK27
YOR037W	CYC2
YOR114W	YOR114W
YOR188W	MSB1
YOR202W	HIS3
YPL135W	ISU1
YPL185W	YPL185W
YPL192C	PRM3
YPL197C	YPL197C
YPR020W	ATP20
YPR133W-A	TOM5
